# Supplementary material for: Mycobacterium avium Subspecies paratuberculosis Infects and Replicates within Human Monocyte-Derived Dendritic Cells
Source: PubMed Central journal article supplement (PMC7409171; doi:10.3390/microorganisms8070994), 2020-07-03
Supplement: microorganisms-08-00994-s001.pdf [file microorganisms-08-00994-s001.pdf]

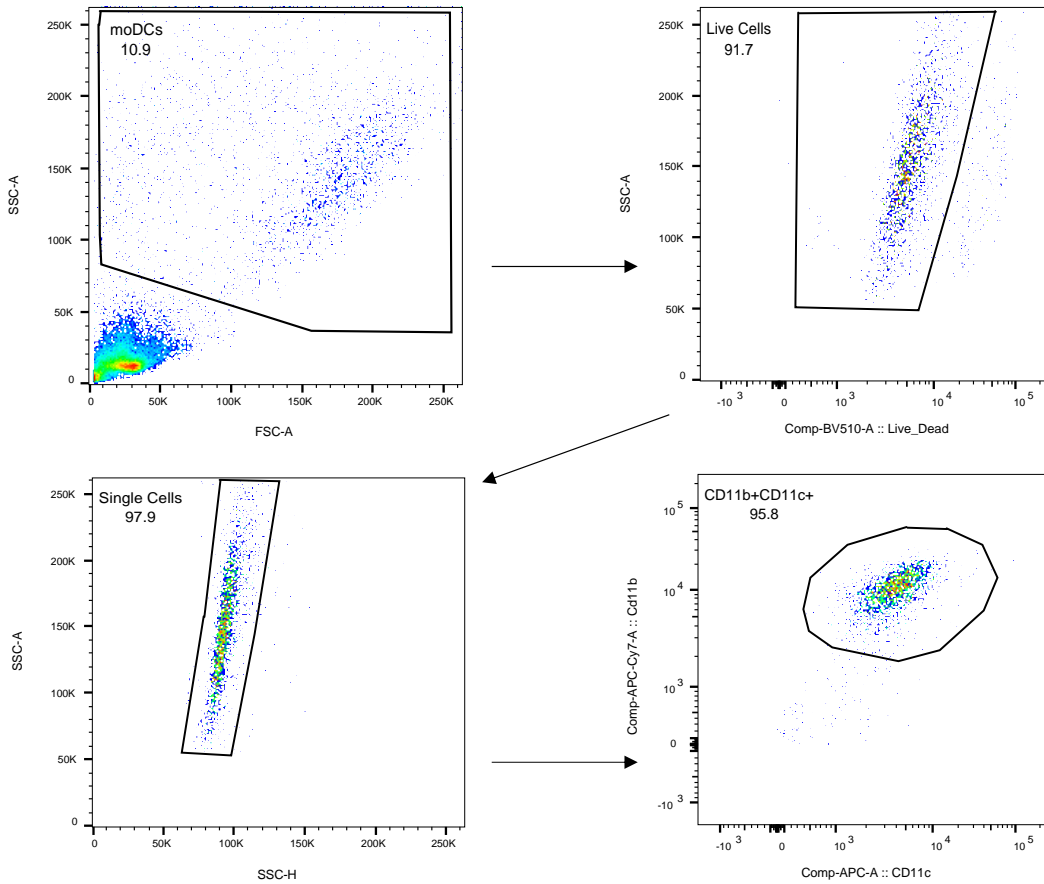

**Figure S1.** Flow cytometry gating strategy. Human moDCs at  $T = 0, 24,$  or  $48$  h after MAP infection were stained, as described in the Methods, and gated sequentially on forward/side scatter, single cells (SSC-A/SSC-H), viability, and finally CD11b<sup>+</sup> and CD11c<sup>+</sup> cells, prior to calculation of MFIs for CD80, CD86, MHCII, CD103, CD11b, and CD11c.

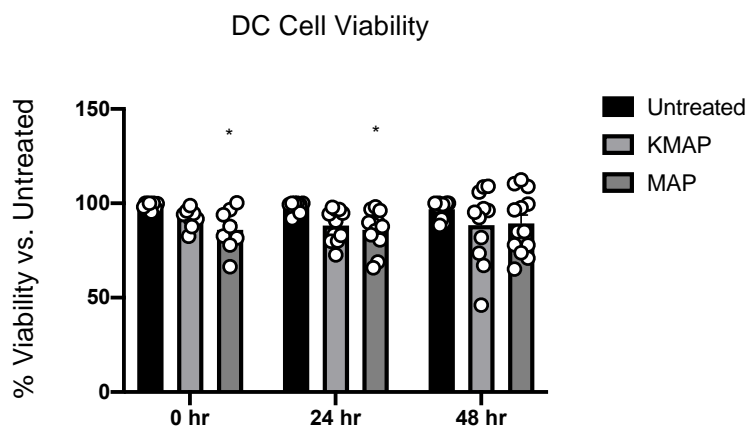

**Figure S2.** Cell viability post MAP infection. The percentage of live moDCs untreated or post MAP/KMAP infection was calculated following forward/side scatter, CD11b<sup>+</sup> and CD11c<sup>+</sup>, and gated on SSC-A and BV510 (viability dye). \*  $p < 0.05$  as calculated using a two-way ANOVA with multiple comparisons, shown is the average  $\pm$  SEM of  $n = 4$  DC blood donors in triplicates.

Fig S3

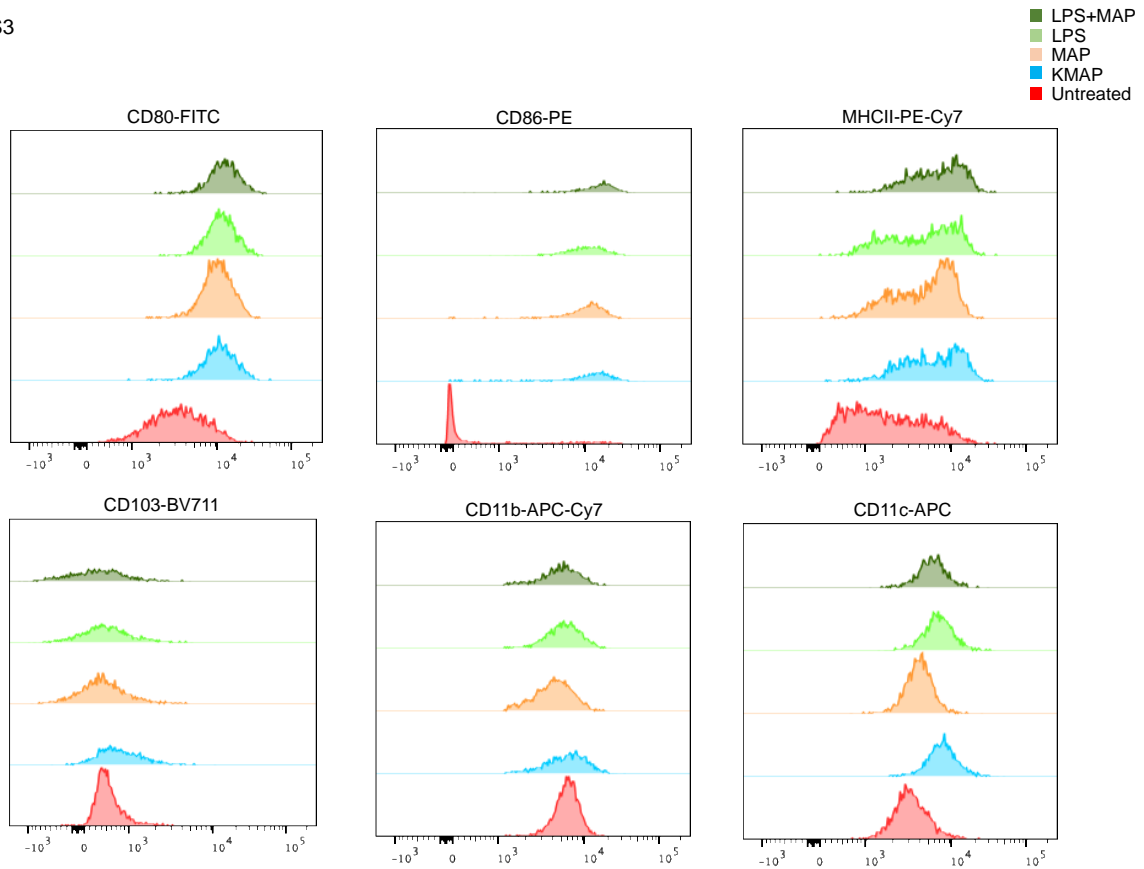

**Figure S3.** Flow cytometry MFI shifts. Human MoDCs at  $T = 0, 24,$  or  $48$  h after the MAP infection were stained, as described in Methods, and gated sequentially on forward/side scatter, single cells (SSC-A/SSC-H), viability, and finally  $CD11b^+$  and  $CD11c^+$  cells. MFI shifts of a representative experiment at  $T = 24$  are shown.
